# Supplementary material for: Insufficiency of annual praziquantel treatment to control Schistosoma mansoni infections in adult women: A longitudinal cohort study in rural Tanzania
Source: PubMed Central journal article supplement (PMC6894890; doi:10.1371/journal.pntd.0007844), 2019-11-21
Supplement: pntd.0007844.s002.pdf [file pntd.0007844.s002.pdf]

**S1 Table. Further details about water contact in women who did and did not develop recurrent or incident *S. mansoni* infection\***

|                                                  | <b>Recurrent or incident infection at any follow-up (n=12)</b> | <b>Schistosome-uninfected at all follow-ups (n=37)</b> | <b>p-value</b> |
|--------------------------------------------------|----------------------------------------------------------------|--------------------------------------------------------|----------------|
| Primary drinking water source                    |                                                                |                                                        | <b>0.028</b>   |
| Pipe                                             | <b>4 (33.3)</b>                                                | <b>24 (64.9)</b>                                       |                |
| Lake                                             | <b>1 (8.3)</b>                                                 | <b>3 (8.1)</b>                                         |                |
| Well                                             | <b>5 (41.7)</b>                                                | <b>4 (10.8)</b>                                        |                |
| No answer                                        | <b>2 (16.7)</b>                                                | <b>6 (16.2)</b>                                        |                |
| Ever use lake water for drinking                 | 5 (41.7)                                                       | 8 (21.6)                                               | 0.26           |
| Primary cooking water source                     |                                                                |                                                        | 0.26           |
| Pipe                                             | 5 (41.7)                                                       | 23 (62.2)                                              |                |
| Lake                                             | 1 (8.3)                                                        | 3 (8.1)                                                |                |
| Well                                             | 4 (33.3)                                                       | 5 (13.5)                                               |                |
| No answer                                        | 2 (16.7)                                                       | 6 (16.2)                                               |                |
| Ever use lake water for cooking                  | 3 (25.0)                                                       | 5 (13.5)                                               | 0.39           |
| Primary bath water source                        |                                                                |                                                        | 0.72           |
| Pipe                                             | 5 (41.7)                                                       | 17 (45.9)                                              |                |
| Lake                                             | 2 (16.7)                                                       | 4 (10.8)                                               |                |
| Well                                             | 5 (41.7)                                                       | 10 (27.0)                                              |                |
| No answer                                        | 0 (0.00)                                                       | 6 (16.2)                                               |                |
| Ever use lake water to bathe                     | 3 (25.0)                                                       | 7 (18.9)                                               | 0.69           |
| Primary laundry water source                     |                                                                |                                                        | 0.70           |
| Pipe                                             | 5 (41.7)                                                       | 18 (48.6)                                              |                |
| Lake                                             | 2 (16.7)                                                       | 4 (10.8)                                               |                |
| Well                                             | 4 (33.3)                                                       | 8 (21.6)                                               |                |
| No answer                                        | 1 (8.3)                                                        | 7 (18.9)                                               |                |
| Ever use lake water for laundry                  | 1 (8.3)                                                        | 9 (24.3)                                               | 0.41           |
| Primary farm water source                        |                                                                |                                                        | 0.43           |
| Rainwater                                        | 5 (41.7)                                                       | 18 (48.6)                                              |                |
| River                                            | 3 (25.0)                                                       | 3 (8.1)                                                |                |
| Other                                            | 4 (33.3)                                                       | 10 (27.0)                                              |                |
| No answer                                        | 0 (0.00)                                                       | 6 (16.2)                                               |                |
| Ever use lake water for farming                  | 1 (8.33)                                                       | 2 (5.4)                                                | 1.0            |
| Ever fish in lake                                | 1 (8.33)                                                       | 2 (5.4)                                                | 1.0            |
| Ever swim in lake                                | 5 (41.7)                                                       | 7 (18.9)                                               | 0.14           |
| Swam in lake in past 3 months                    | <b>3 (33.3)</b>                                                | <b>1 (2.86)</b>                                        | <b>0.023</b>   |
| Entered lake for other reason in past 3 months** | 6 (54.5)                                                       | 9 (24.3)                                               | 0.074          |
| For travel                                       | 3 (50.0)                                                       | 5 (55.5)                                               |                |
| To wash dishes/clothes                           | 2 (33.3)                                                       | 3 (33.3)                                               |                |
| To fetch water                                   | 0 (0.00)                                                       | 1 (11.1)                                               |                |
| To fish                                          | 0 (0.00)                                                       | 1 (11.1)                                               |                |
| No answer                                        | 1 (16.6)                                                       | 0 (0.00)                                               |                |
| Distance from lake (minutes walking)             | 30 [10-45]                                                     | 30 [10-240]                                            | 0.62           |

\*Survey administered to women seen at 12-month follow-up

\*\*Multiple answers permitted
